# Supplementary material for: Influence of A-site cations on the open-circuit voltage of efficient perovskite solar cells: a case of rubidium and guanidinium additives
Source: Royal Society of Chemistry journal article supplement (doi:10.1039/c9ta00272c), 2019-01-01
Supplement: c9ta00272c1.pdf [file c9ta00272c1.pdf]

## Supplementary Information

### Influence of A-Site Cation on the Open-Circuit Voltage of Efficient Perovskite Solar Cells: A case of Rubidium and Guanidinium Additives

*Daniel Prochowicz,<sup>a</sup> Mohammad Mahdi Tavakoli,<sup>b,c\*</sup> Abul Kalam,<sup>d,e</sup> Rohit D. Chavan,<sup>f</sup> Suverna Trivedi,<sup>g</sup> Manoj Kumar<sup>h</sup> and Pankaj Yadav<sup>i,\*</sup>*

<sup>a</sup> *Institute of Physical Chemistry, Polish Academy of Sciences, Kasprzaka 44/52, 01-224 Warsaw, Poland*

<sup>b</sup> *Department of Electrical Engineering and Computer Science, Massachusetts Institute of Technology, Cambridge, MA 02139, USA*

<sup>c</sup> *Department of Materials Science and Engineering, Sharif University of Technology, 14588 Tehran, Iran*

<sup>d</sup> *Department of Chemistry, College of Science, King Khalid University, Saudi Arabia*

<sup>e</sup> *Research Center for Advanced Materials Science (RCAMS), King Khalid University, Saudi Arabia*

<sup>f</sup> *Polymer Energy Materials Laboratory, School of Applied Chemical Engineering, Chonnam National University, Gwangju 500-757, South Korea.*

<sup>g</sup> *Department of Chemical Engineering, School of Technology, Pandit Deendayal Petroleum University, Gandhinagar-382 007, Gujarat, India*

<sup>h</sup> *Department of Science, School of Technology, Pandit Deendayal Petroleum University, Gandhinagar-382 007, Gujarat, India*

<sup>i</sup> *Department of Solar Energy, School of Technology, Pandit Deendayal Petroleum University, Gandhinagar-382 007, Gujarat, India*

#### Corresponding authors:

[mtavakol@mit.edu](mailto:mtavakol@mit.edu), [pankaj.yadav@sse.pdpu.ac.in](mailto:pankaj.yadav@sse.pdpu.ac.in), [pankajphd11@gmail.com](mailto:pankajphd11@gmail.com)

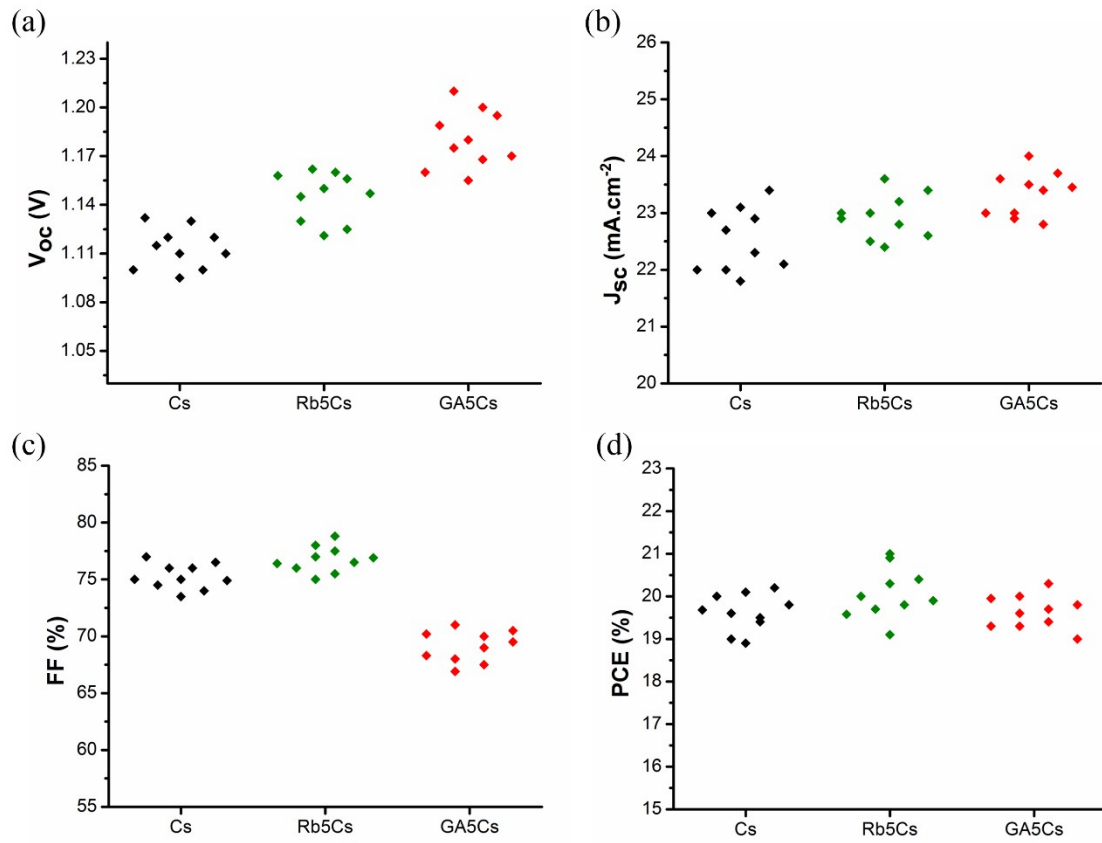

**Fig. S1.** Statistics of photovoltaic parameters for the Cs, Rb<sub>5</sub>Cs, and GA<sub>5</sub>Cs PSCs, (a)  $V_{oc}$ , (b)  $J_{sc}$ , (c) FF, and (d) PCE.

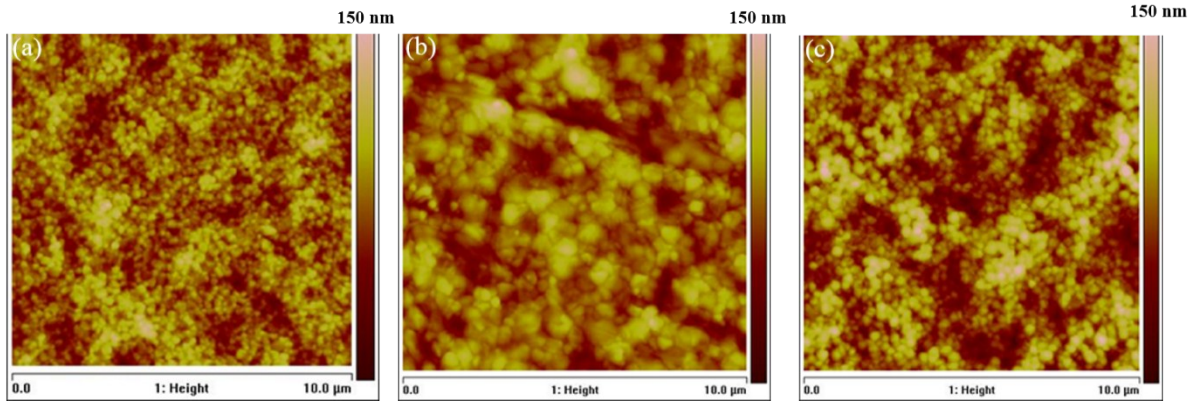

**Fig. S2.** AFM images of (a) Cs, (b) Rb<sub>5</sub>Cs (c) and (d) GA<sub>5</sub>Cs perovskite films.

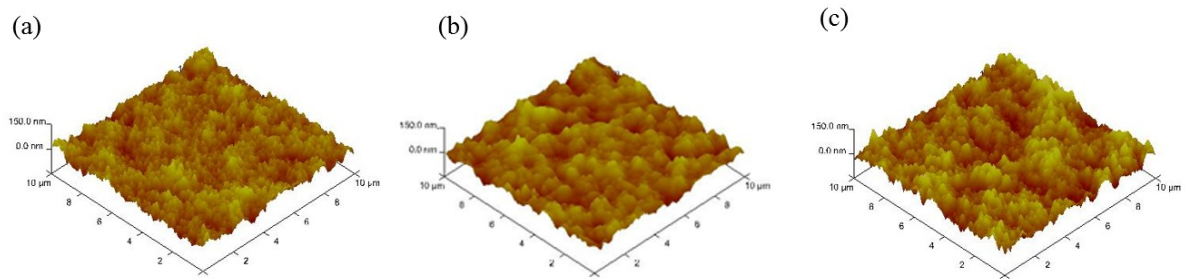

**Fig. S3.** Three-dimensional AFM images of (a) Cs, (b) Rb<sub>5</sub>Cs and (c) GA<sub>5</sub>Cs perovskites deposited on glass slide.

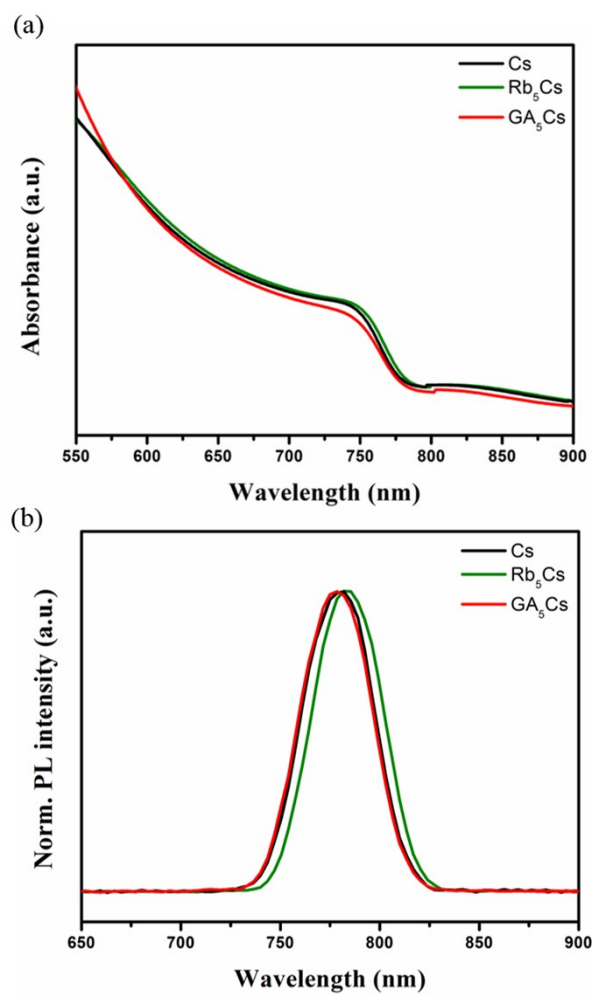

**Fig. S4.** UV-visible and PL spectra of Cs, Rb<sub>5</sub>Cs and GA<sub>5</sub>Cs perovskites deposited on glass slide.

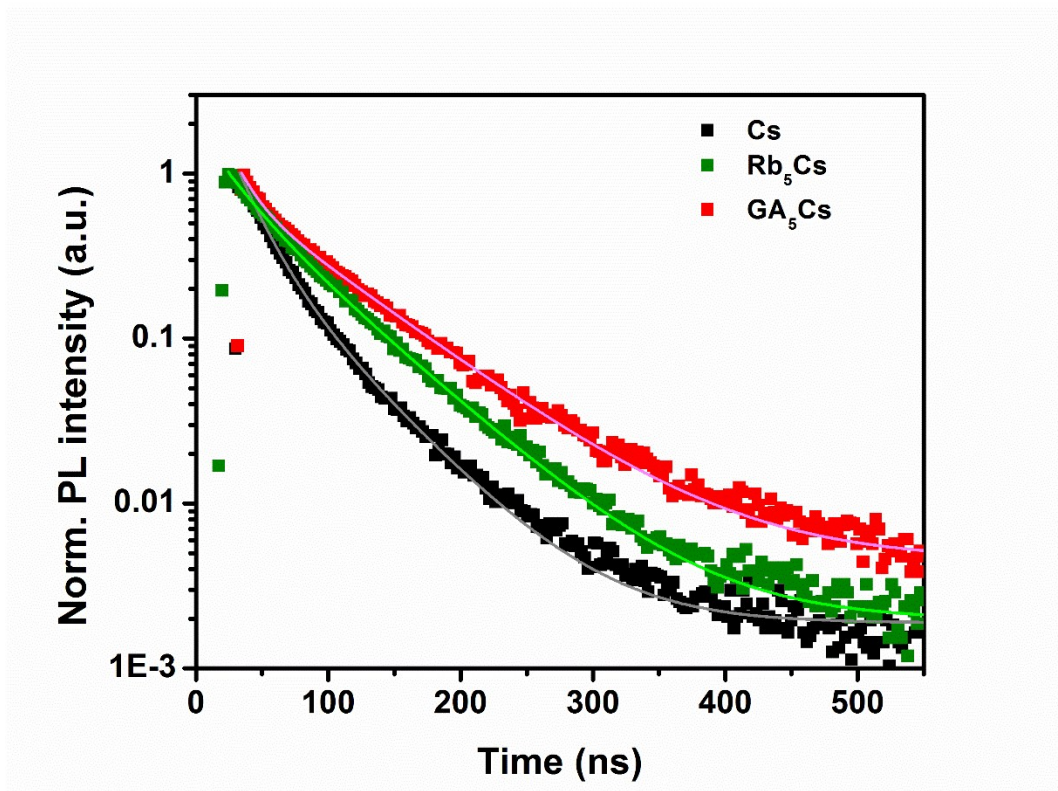

**Fig. S5.** Time-resolved PL (TRPL) spectra of Cs, Rb<sub>5</sub>Cs and GA<sub>5</sub>Cs based perovskite films deposited on glass slides.

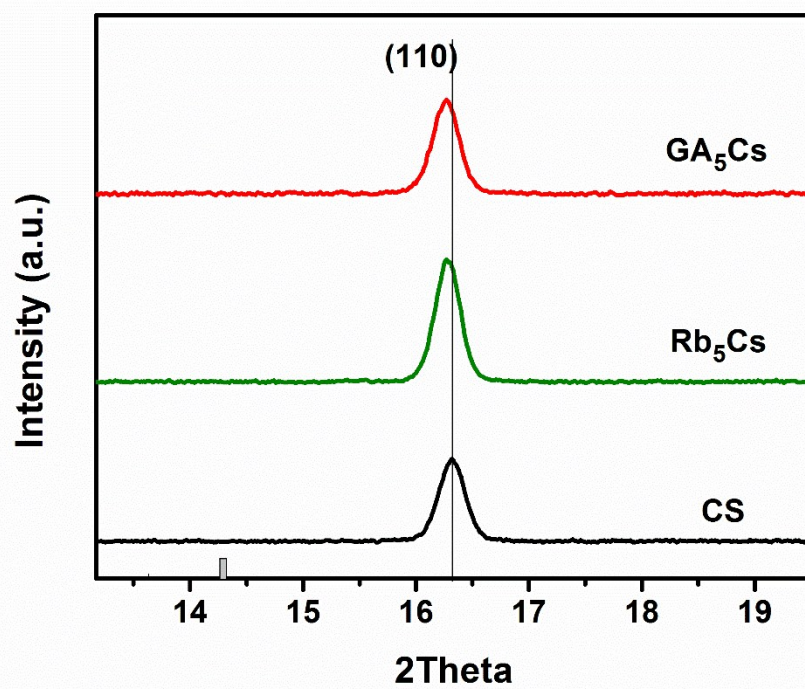

**Fig. S6.** XRD patterns of Cs,  $\text{Rb}_5\text{Cs}$  and  $\text{GA}_5\text{Cs}$  perovskite films, zoomed on (110) peak.

**Table S1.** Photovoltaic parameters of the best performing Cs, Rb<sub>5</sub>Cs and GA<sub>5</sub>Cs PSCs

| Device             | V <sub>oc</sub> (V) | J <sub>sc</sub> (mA/cm <sup>2</sup> ) | FF (%) | PCE (%) |
|--------------------|---------------------|---------------------------------------|--------|---------|
| Cs                 | 1.12                | 22.7                                  | 76     | 19.7    |
| Rb <sub>5</sub> Cs | 1.16                | 22.8                                  | 78     | 21      |
| GA <sub>5</sub> Cs | 1.2                 | 23.6                                  | 70     | 20.3    |

**Table S2.** Fitting parameters of the corresponding TRPL curves

| Perovskite         | A    | $\tau$ (ns) |
|--------------------|------|-------------|
| Cs                 | 2.9  | 29.7        |
| Rb <sub>5</sub> Cs | 1.59 | 49.6        |
| GA <sub>5</sub> Cs | 1.6  | 56.5        |
